# Supplementary material
Source: Research Square preprint supplement (doi:10.21203/rs.3.rs-10209423/v1)
Supplement: Supplementary file 1 [file 2c21f6a2cc005f3e063c7731.xlsx]

## Sheet: TableS1
Table S1. Full list of nominally significant exposome-wide associations across all six cardiovascular outcomes
Outcome	Chemical	Abbreviation	NHANES code	Category	Biospecimen	Unit	OR (95% CI) per doubling	P-value	FDR P-value	Analytic sample n	Events	Weighted cases
Angina	Urinary marker (verify in codebook)	DMN	URXDMN	Specific Pesticide Metabolites (urine)	Urine	ug/L	1.19 (1.09, 1.29)	6.62e-05	0.005	1944	47	160137.2
Angina	PCB180 Lipid Adjusted	PCB180	LBX180LA	POPs - PCBs (serum, lipid-adj)	Serum	ng/g lipid	1.47 (1.21, 1.79)	9.31e-05	0.005	3607	139	526200.6
Angina	PCB170 Lipid Adjusted	PCB170	LBX170LA	POPs - PCBs (serum, lipid-adj)	Serum	ng/g lipid	1.50 (1.22, 1.85)	0.000153	0.005	3515	136	509170.9
Angina	Ethylene Oxide Hemoglobin Adduct	EO-Hb	LBXEOA	Hemoglobin Adducts (blood)	Blood	pmol/g Hb	1.35 (1.15, 1.57)	0.000156	0.005	5017	123	460289.7
Angina	Trans-Nonachlor Lipid Adjusted	trans-Nonachlor	LBXTNALA	POPs - OC Pesticides (serum, lipid-adj)	Serum	ng/g lipid	1.28 (1.09, 1.52)	0.004	0.1	3657	140	532413.4
Angina	PCB187 Lipid Adjusted	PCB187	LBX187LA	POPs - PCBs (serum, lipid-adj)	Serum	ng/g lipid	1.34 (1.09, 1.63)	0.005	0.107	3611	139	526200.6
Angina	Perfluorohexane Sulfonic Acid	PFHxS	LBXPFHS	PFAS (serum)	Serum	ng/mL	0.82 (0.71, 0.95)	0.008	0.162	11739	318	1099322.3
Angina	Mono-n-Methyl Phthalate	MMP	URXMNM	Phthalates (urine)	Urine	ng/mL	1.12 (1.03, 1.22)	0.011	0.171	9111	248	838542.1
Angina	Glycidamide Hemoglobin Adduct	Glycidamide-Hb	LBXGLY	Hemoglobin Adducts (blood)	Blood	pmol/g Hb	0.84 (0.73, 0.96)	0.012	0.171	11366	367	1301847.8
Angina	3,3',4,4',5,5'-Hexachlorobiphenyl (PCB169) or HCB Lipid Adjusted	PCB169/HCB	LBXHXCLA	POPs - PCBs (serum, lipid-adj)	Serum	ng/g lipid	1.30 (1.06, 1.61)	0.013	0.171	3302	123	448566.5
Angina	Blood Lead	Blood Pb	LBXBPB	Heavy Metals - Blood	Blood	ug/dL	0.89 (0.80, 0.98)	0.015	0.171	39644	1161	4129495.3
Angina	Lead Urine	U-Pb	URXUPB	Urine Metals	Urine	ug/L	0.90 (0.82, 0.98)	0.016	0.171	16597	458	1631832.6
Angina	3,3',4,4',5-Pentachlorobiphenyl (PCB126) Lipid Adjusted	PCB126	LBXPCBLA	POPs - PCBs (serum, lipid-adj)	Serum	ng/g lipid	1.24 (1.04, 1.48)	0.016	0.171	3300	122	446516.1
Angina	Enterolactone Urine	Enterolactone	URXETL	Phytoestrogens (urine)	Urine	ug/L	0.93 (0.88, 0.99)	0.018	0.177	8786	242	827123.1
Angina	Blood Nitromethane	Nitromethane	LBXNM	Blood Aldehydes	Blood	pg/mL	1.47 (1.04, 2.08)	0.031	0.282	5954	147	492891.3
Angina	2,4-Dichlorophenol	2,4-DCP	URX24D	Specific Pesticide Metabolites (urine)	Urine	ug/L	1.12 (1.01, 1.24)	0.036	0.31	12836	369	1359475.9
Angina	Beta-Hexachlorocyclohexane (beta-HCH) Lipid Adjusted	beta-HCH	LBXBHCLA	POPs - OC Pesticides (serum, lipid-adj)	Serum	ng/g lipid	1.18 (1.01, 1.38)	0.042	0.31	2594	99	361544.0
Angina	Total Urinary Arsenic	U-As(total)	URXUAS	Arsenic Speciated (urine)	Urine	ug/L	0.90 (0.82, 1.00)	0.043	0.31	14023	359	1285842.2
Angina	Serum Cotinine	Cotinine	LBXCOT	Smoking/Nicotine Biomarkers	Serum	ng/mL	1.03 (1.00, 1.05)	0.043	0.31	43845	1271	4558021.3
Angina	PCB153 Lipid Adjusted	PCB153	LBX153LA	POPs - PCBs (serum, lipid-adj)	Serum	ng/g lipid	1.29 (1.01, 1.64)	0.045	0.31	3610	139	526200.6
Angina	Oxychlordane Lipid Adjusted	Oxychlordane	LBXOXYLA	POPs - OC Pesticides (serum, lipid-adj)	Serum	ng/g lipid	1.32 (1.00, 1.73)	0.049	0.319	3422	130	488151.2
Coronary heart disease	Trans-Nonachlor Lipid Adjusted	trans-Nonachlor	LBXTNALA	POPs - OC Pesticides (serum, lipid-adj)	Serum	ng/g lipid	1.52 (1.20, 1.94)	0.000633	0.063	3656	157	570957.8
Coronary heart disease	Urinary marker (verify in codebook)	DMN	URXDMN	Specific Pesticide Metabolites (urine)	Urine	ug/L	1.17 (1.07, 1.29)	0.000919	0.063	1941	67	254688.0
Coronary heart disease	PCB180 Lipid Adjusted	PCB180	LBX180LA	POPs - PCBs (serum, lipid-adj)	Serum	ng/g lipid	1.49 (1.15, 1.94)	0.003	0.08	3611	153	532408.1
Coronary heart disease	Beta-Hexachlorocyclohexane (beta-HCH) Lipid Adjusted	beta-HCH	LBXBHCLA	POPs - OC Pesticides (serum, lipid-adj)	Serum	ng/g lipid	1.29 (1.09, 1.52)	0.003	0.08	2593	117	410600.5
Coronary heart disease	PCB170 Lipid Adjusted	PCB170	LBX170LA	POPs - PCBs (serum, lipid-adj)	Serum	ng/g lipid	1.53 (1.15, 2.04)	0.003	0.08	3518	150	523896.6
Coronary heart disease	Serum Cotinine	Cotinine	LBXCOT	Smoking/Nicotine Biomarkers	Serum	ng/mL	1.03 (1.01, 1.05)	0.003	0.08	43818	1812	6389071.9
Coronary heart disease	3,3',4,4',5-Pentachlorobiphenyl (PCB126) Lipid Adjusted	PCB126	LBXPCBLA	POPs - PCBs (serum, lipid-adj)	Serum	ng/g lipid	1.36 (1.09, 1.68)	0.006	0.111	3305	139	474852.8
Coronary heart disease	Ethylene Oxide Hemoglobin Adduct	EO-Hb	LBXEOA	Hemoglobin Adducts (blood)	Blood	pmol/g Hb	1.30 (1.08, 1.57)	0.007	0.111	5014	195	830837.1
Coronary heart disease	2-Methylhippuric Acid	2-MHA	URX2MH	VOC Metabolites - Organic Acids (urine)	Urine	ng/mL	0.87 (0.79, 0.96)	0.007	0.111	9464	357	1477650.3
Coronary heart disease	Triclosan Urine	Triclosan	URXTRS	Phenols & PCPs (urine)	Urine	ng/mL	0.93 (0.89, 0.98)	0.01	0.128	10802	445	1539076.6
Coronary heart disease	3,5,6-Trichloro-2-Pyridinol (TCPy)	TCPy	URXCPM	Specific Pesticide Metabolites (urine)	Urine	ug/L	1.13 (1.03, 1.24)	0.01	0.128	10074	396	1414520.5
Coronary heart disease	Tungsten Urine	U-W	URXUTU	Urine Metals	Urine	ug/L	1.11 (1.02, 1.21)	0.011	0.128	16488	641	2318233.3
Coronary heart disease	o-Toluidine Urine	o-Tol	URXOTD	Aromatic Amines (urine)	Urine	pg/mL	1.37 (1.07, 1.76)	0.013	0.135	1976	69	261953.8
Coronary heart disease	Arsenous Acid (AsIII) Urine	As(III)	URXUAS3	Arsenic Speciated (urine)	Urine	ug/L	0.85 (0.74, 0.97)	0.016	0.158	14031	545	2000351.3
Coronary heart disease	Oxychlordane Lipid Adjusted	Oxychlordane	LBXOXYLA	POPs - OC Pesticides (serum, lipid-adj)	Serum	ng/g lipid	1.36 (1.06, 1.76)	0.017	0.158	3420	144	509830.2
Coronary heart disease	PCB187 Lipid Adjusted	PCB187	LBX187LA	POPs - PCBs (serum, lipid-adj)	Serum	ng/g lipid	1.37 (1.05, 1.79)	0.023	0.194	3615	153	532408.1
Coronary heart disease	Glycidamide Hemoglobin Adduct	Glycidamide-Hb	LBXGLY	Hemoglobin Adducts (blood)	Blood	pmol/g Hb	0.85 (0.74, 0.98)	0.025	0.2	11355	483	1749480.5
Coronary heart disease	Barium Urine	U-Ba	URXUBA	Urine Metals	Urine	ug/L	0.92 (0.85, 0.99)	0.034	0.259	16450	638	2324180.8
Coronary heart disease	1-Aminonaphthalene Urine	1-AN	URX1NP	Aromatic Amines (urine)	Urine	pg/mL	0.87 (0.76, 1.00)	0.042	0.286	2005	63	252696.2
Coronary heart disease	3- and 4-Methylhippuric Acid	3&4-MHA	URX34M	VOC Metabolites - Organic Acids (urine)	Urine	ng/mL	0.90 (0.82, 1.00)	0.045	0.286	9660	361	1484926.5
Coronary heart disease	2-(N-Methyl-PFOSA) Acetate	MeFOSAA	LBXMPAH	PFAS (serum)	Serum	ng/mL	1.12 (1.00, 1.24)	0.046	0.286	11741	485	1685691.4
Coronary heart disease	Daidzein Urine	Daidzein	URXDAZ	Phytoestrogens (urine)	Urine	ug/L	0.94 (0.89, 1.00)	0.046	0.286	8775	352	1209902.6
Coronary heart disease	Blood Nitromethane	Nitromethane	LBXNM	Blood Aldehydes	Blood	pg/mL	1.31 (1.00, 1.71)	0.049	0.286	5947	214	622614.1
Coronary heart disease	Mono-2-Hydroxy-Isobutyl Phthalate	MHiBP2	URXHIBP	Phthalates (urine)	Urine	ng/mL	0.88 (0.77, 1.00)	0.049	0.286	2947	117	432751.5
Composite cardiovascular disease	Blood Cadmium	Blood Cd	LBXBCD	Heavy Metals - Blood	Blood	ug/L	1.15 (1.08, 1.21)	2.21e-06	0.000158	39607	4312	14100721.4
Composite cardiovascular disease	Serum Cotinine	Cotinine	LBXCOT	Smoking/Nicotine Biomarkers	Serum	ng/mL	1.03 (1.02, 1.04)	2.28e-06	0.000158	43802	4759	15771963.5
Composite cardiovascular disease	Blood Nitromethane	Nitromethane	LBXNM	Blood Aldehydes	Blood	pg/mL	1.49 (1.23, 1.80)	4.25e-05	0.002	5947	619	1824862.3
Composite cardiovascular disease	Ethylene Oxide Hemoglobin Adduct	EO-Hb	LBXEOA	Hemoglobin Adducts (blood)	Blood	pmol/g Hb	1.29 (1.14, 1.46)	4.86e-05	0.002	5010	548	1914429.7
Composite cardiovascular disease	Triclosan Urine	Triclosan	URXTRS	Phenols & PCPs (urine)	Urine	ng/mL	0.94 (0.91, 0.97)	0.000146	0.004	10788	1147	3776750.5
Composite cardiovascular disease	Linear Perfluorooctanoate	n-PFOA	LBXNFOA	PFAS (serum)	Serum	ng/mL	0.72 (0.60, 0.86)	0.000272	0.006	2818	319	1114241.5
Composite cardiovascular disease	Barium Urine	U-Ba	URXUBA	Urine Metals	Urine	ug/L	0.92 (0.87, 0.96)	0.000517	0.01	16450	1779	5831093.5
Composite cardiovascular disease	N-Acetyl-S-(2-Cyanoethyl)-L-Cysteine (CYMA)	CYMA	URXCYM	VOC Metabolites - Mercapturic Acids (urine)	Urine	ng/mL	1.09 (1.04, 1.15)	0.001	0.021	9604	1020	3611717.8
Composite cardiovascular disease	Tungsten Urine	U-W	URXUTU	Urine Metals	Urine	ug/L	1.09 (1.03, 1.15)	0.002	0.026	16488	1784	5825280.2
Composite cardiovascular disease	Urinary Nitrate	Nitrate	URXNO3	Perchlorate/Nitrate/Thiocyanate (urine)	Urine	ng/mL	0.92 (0.87, 0.97)	0.002	0.029	18466	1954	6407917.5
Composite cardiovascular disease	Urinary Iodine	U-I	URXUIO	Iodine (urine)	Urine	ug/L	1.08 (1.03, 1.14)	0.003	0.043	17054	1795	5667150.1
Composite cardiovascular disease	Lead Urine	U-Pb	URXUPB	Urine Metals	Urine	ug/L	0.91 (0.84, 0.97)	0.006	0.066	16572	1795	5858194.8
Composite cardiovascular disease	Arsenous Acid (AsIII) Urine	As(III)	URXUAS3	Arsenic Speciated (urine)	Urine	ug/L	0.89 (0.81, 0.97)	0.006	0.066	14030	1539	5061595.8
Composite cardiovascular disease	Mercury Urine (inorganic)	U-Hg	URXUHG	Urine Metals	Urine	ug/L	0.92 (0.87, 0.98)	0.007	0.066	14916	1379	4500220.7
Composite cardiovascular disease	Blood Mercury Total	Blood THg	LBXTHG	Heavy Metals - Blood	Blood	ug/L	0.95 (0.91, 0.99)	0.01	0.095	34183	3580	11756847.1
Composite cardiovascular disease	2-Aminothiazoline-4-Carboxylic Acid (ATCA)	ATCA	URXATC	VOC Metabolites - Mercapturic Acids (urine)	Urine	ng/mL	0.91 (0.84, 0.98)	0.013	0.112	9553	1019	3580905.4
Composite cardiovascular disease	o-Anisidine Urine	o-An	URXANS	Aromatic Amines (urine)	Urine	pg/mL	0.87 (0.77, 0.97)	0.015	0.123	1898	176	644317.3
Composite cardiovascular disease	Trans-Nonachlor Lipid Adjusted	trans-Nonachlor	LBXTNALA	POPs - OC Pesticides (serum, lipid-adj)	Serum	ng/g lipid	1.22 (1.03, 1.43)	0.019	0.142	3662	414	1427126.7
Composite cardiovascular disease	Oxychlordane Lipid Adjusted	Oxychlordane	LBXOXYLA	POPs - OC Pesticides (serum, lipid-adj)	Serum	ng/g lipid	1.22 (1.03, 1.46)	0.025	0.182	3426	385	1302856.6
Composite cardiovascular disease	Glycidamide Hemoglobin Adduct	Glycidamide-Hb	LBXGLY	Hemoglobin Adducts (blood)	Blood	pmol/g Hb	0.90 (0.82, 0.99)	0.029	0.2	11361	1265	4296980.8
Composite cardiovascular disease	Beta-Hexachlorocyclohexane (beta-HCH) Lipid Adjusted	beta-HCH	LBXBHCLA	POPs - OC Pesticides (serum, lipid-adj)	Serum	ng/g lipid	1.12 (1.01, 1.25)	0.032	0.21	2596	299	974971.5
Composite cardiovascular disease	Dimethylarsonic Acid Urine	DMA	URXUDMA	Arsenic Speciated (urine)	Urine	ug/L	0.92 (0.84, 1.00)	0.041	0.242	14030	1539	5061595.8
Composite cardiovascular disease	Bisphenol A Urine	BPA	URXBPH	Phenols & PCPs (urine)	Urine	ng/mL	1.06 (1.00, 1.12)	0.041	0.242	12178	1312	4328083.0
Composite cardiovascular disease	Branched Isomers of PFOS	Br-PFOS	LBXMFOS	PFAS (serum)	Serum	ng/mL	0.82 (0.67, 1.00)	0.048	0.242	2818	319	1114241.5
Composite cardiovascular disease	Daidzein Urine	Daidzein	URXDAZ	Phytoestrogens (urine)	Urine	ug/L	0.96 (0.93, 1.00)	0.048	0.242	8775	880	2854688.0
Composite cardiovascular disease	Bisphenol F Urine	BPF	URXBPF	Phenols & PCPs (urine)	Urine	ug/L	1.09 (1.00, 1.18)	0.049	0.242	4565	486	1690025.8
Composite cardiovascular disease	Blood Toluene	Toluene	LBXVTO	Blood VOCs	Blood	ng/mL	1.08 (1.00, 1.16)	0.049	0.242	13333	1249	4170911.1
Heart attack	Blood Cadmium	Blood Cd	LBXBCD	Heavy Metals - Blood	Blood	ug/L	1.22 (1.14, 1.31)	5.43e-08	7.49e-06	39714	1708	5610376.8
Heart attack	Serum Cotinine	Cotinine	LBXCOT	Smoking/Nicotine Biomarkers	Serum	ng/mL	1.04 (1.03, 1.06)	7.22e-07	4.98e-05	43917	1890	6274179.3
Heart attack	o-Toluidine Urine	o-Tol	URXOTD	Aromatic Amines (urine)	Urine	pg/mL	1.42 (1.18, 1.70)	0.000158	0.007	1980	72	254156.7
Heart attack	Linear Perfluorooctanoate	n-PFOA	LBXNFOA	PFAS (serum)	Serum	ng/mL	0.73 (0.60, 0.88)	0.001	0.044	2833	136	448487.8
Heart attack	Trans-Nonachlor Lipid Adjusted	trans-Nonachlor	LBXTNALA	POPs - OC Pesticides (serum, lipid-adj)	Serum	ng/g lipid	1.34 (1.10, 1.62)	0.003	0.089	3671	164	595981.1
Heart attack	Ethylene Oxide Hemoglobin Adduct	EO-Hb	LBXEOA	Hemoglobin Adducts (blood)	Blood	pmol/g Hb	1.38 (1.10, 1.71)	0.004	0.099	5023	215	735628.1
Heart attack	Triclosan Urine	Triclosan	URXTRS	Phenols & PCPs (urine)	Urine	ng/mL	0.93 (0.89, 0.98)	0.006	0.119	10821	467	1576672.2
Heart attack	Mono-(2-Ethylhexyl) Phthalate	MEHP	URXMHP	Phthalates (urine)	Urine	ng/mL	1.11 (1.03, 1.21)	0.01	0.174	14966	641	2129945.6
Heart attack	Acrylamide Hemoglobin Adduct	Acrylamide-Hb	LBXACR	Hemoglobin Adducts (blood)	Blood	pmol/g Hb	1.25 (1.05, 1.50)	0.014	0.21	11512	512	1710025.6
Heart attack	Blood Nitromethane	Nitromethane	LBXNM	Blood Aldehydes	Blood	pg/mL	1.44 (1.07, 1.94)	0.016	0.218	5966	215	611750.2
Heart attack	Cadmium Urine	U-Cd	URXUCD	Urine Metals	Urine	ng/mL	1.13 (1.02, 1.24)	0.018	0.218	14041	600	1950572.9
Heart attack	N-Acetyl-S-(2-Cyanoethyl)-L-Cysteine (CYMA)	CYMA	URXCYM	VOC Metabolites - Mercapturic Acids (urine)	Urine	ng/mL	1.12 (1.02, 1.24)	0.019	0.218	9628	395	1419158.0
Heart attack	Bisphenol A Urine	BPA	URXBPH	Phenols & PCPs (urine)	Urine	ng/mL	1.09 (1.01, 1.18)	0.033	0.322	12213	531	1825372.5
Heart attack	Tungsten Urine	U-W	URXUTU	Urine Metals	Urine	ug/L	1.08 (1.01, 1.16)	0.033	0.322	16530	702	2294781.5
Heart attack	2-Methylhippuric Acid	2-MHA	URX2MH	VOC Metabolites - Organic Acids (urine)	Urine	ng/mL	0.88 (0.78, 0.99)	0.036	0.322	9486	394	1417251.2
Heart attack	Mono-n-Methyl Phthalate	MMP	URXMNM	Phthalates (urine)	Urine	ng/mL	1.09 (1.00, 1.18)	0.037	0.322	9129	381	1259784.5
Heart attack	N-Acetyl-S-(2-Hydroxypropyl)-L-Cysteine (2-HPMA)	2-HPMA	URXHP2	VOC Metabolites - Mercapturic Acids (urine)	Urine	ng/mL	1.10 (1.00, 1.20)	0.04	0.323	9663	397	1417137.3
Heart attack	Beta-Hexachlorocyclohexane (beta-HCH) Lipid Adjusted	beta-HCH	LBXBHCLA	POPs - OC Pesticides (serum, lipid-adj)	Serum	ng/g lipid	1.20 (1.00, 1.43)	0.049	0.381	2605	123	412284.8
Heart failure	Urinary Nitrate	Nitrate	URXNO3	Perchlorate/Nitrate/Thiocyanate (urine)	Urine	ng/mL	0.81 (0.75, 0.88)	3.61e-07	4.99e-05	18498	549	1673151.2
Heart failure	Blood Cadmium	Blood Cd	LBXBCD	Heavy Metals - Blood	Blood	ug/L	1.27 (1.14, 1.40)	7.46e-06	0.000393	39664	1232	3818524.6
Heart failure	Serum Cotinine	Cotinine	LBXCOT	Smoking/Nicotine Biomarkers	Serum	ng/mL	1.04 (1.02, 1.06)	8.55e-06	0.000393	43869	1386	4276969.7
Heart failure	Perfluorohexane Sulfonic Acid	PFHxS	LBXPFHS	PFAS (serum)	Serum	ng/mL	0.83 (0.75, 0.91)	0.000175	0.005	11748	382	1134411.7
Heart failure	Glycidamide Hemoglobin Adduct	Glycidamide-Hb	LBXGLY	Hemoglobin Adducts (blood)	Blood	pmol/g Hb	0.77 (0.67, 0.88)	0.000187	0.005	11370	361	1164874.3
Heart failure	Blood Mercury Total	Blood THg	LBXTHG	Heavy Metals - Blood	Blood	ug/L	0.88 (0.82, 0.95)	0.000486	0.01	34229	1030	3186496.3
Heart failure	1-Aminonaphthalene Urine	1-AN	URX1NP	Aromatic Amines (urine)	Urine	pg/mL	0.78 (0.68, 0.90)	0.0005	0.01	2009	46	189383.7
Heart failure	N-Acetyl-S-(2-Cyanoethyl)-L-Cysteine (CYMA)	CYMA	URXCYM	VOC Metabolites - Mercapturic Acids (urine)	Urine	ng/mL	1.15 (1.06, 1.25)	0.000559	0.01	9620	284	959174.1
Heart failure	Cobalt Urine	U-Co	URXUCO	Urine Metals	Urine	ug/L	1.15 (1.06, 1.25)	0.001	0.017	16595	495	1553011.6
Heart failure	Lead Urine	U-Pb	URXUPB	Urine Metals	Urine	ug/L	0.86 (0.79, 0.94)	0.001	0.017	16596	495	1553011.6
Heart failure	Tungsten Urine	U-W	URXUTU	Urine Metals	Urine	ug/L	1.14 (1.05, 1.24)	0.001	0.017	16512	489	1533841.1
Heart failure	Triclosan Urine	Triclosan	URXTRS	Phenols & PCPs (urine)	Urine	ng/mL	0.91 (0.86, 0.96)	0.001	0.017	10807	330	890209.1
Heart failure	Benzophenone-3 (Oxybenzone) Urine	BP-3	URXBP3	Phenols & PCPs (urine)	Urine	ng/mL	0.92 (0.87, 0.97)	0.003	0.036	12198	384	1054212.7
Heart failure	Branched Isomers of PFOS	Br-PFOS	LBXMFOS	PFAS (serum)	Serum	ng/mL	0.73 (0.59, 0.91)	0.004	0.042	2827	102	280735.5
Heart failure	Arsenous Acid (AsIII) Urine	As(III)	URXUAS3	Arsenic Speciated (urine)	Urine	ug/L	0.79 (0.67, 0.93)	0.005	0.042	14052	425	1345974.4
Heart failure	Tin Urine	U-Sn	URXUSN	Urine Metals	Urine	ug/L	1.20 (1.06, 1.35)	0.005	0.042	7701	227	744480.5
Heart failure	Linear Perfluorooctane Sulfonate	n-PFOS	LBXNFOS	PFAS (serum)	Serum	ng/mL	0.76 (0.63, 0.93)	0.007	0.053	2827	102	280735.5
Heart failure	Urinary Iodine	U-I	URXUIO	Iodine (urine)	Urine	ug/L	1.12 (1.03, 1.21)	0.008	0.061	17082	512	1512416.0
Heart failure	Trans-Nonachlor Lipid Adjusted	trans-Nonachlor	LBXTNALA	POPs - OC Pesticides (serum, lipid-adj)	Serum	ng/g lipid	1.47 (1.10, 1.96)	0.009	0.064	3665	99	283664.0
Heart failure	Mono-2-Hydroxy-Isobutyl Phthalate	MHiBP2	URXHIBP	Phthalates (urine)	Urine	ng/mL	0.72 (0.56, 0.92)	0.009	0.064	2943	101	258257.5
Heart failure	Barium Urine	U-Ba	URXUBA	Urine Metals	Urine	ug/L	0.92 (0.86, 0.98)	0.011	0.07	16474	490	1551695.1
Heart failure	Mercury Urine (inorganic)	U-Hg	URXUHG	Urine Metals	Urine	ug/L	0.87 (0.78, 0.97)	0.011	0.072	14936	378	1198288.1
Heart failure	Linear Perfluorooctanoate	n-PFOA	LBXNFOA	PFAS (serum)	Serum	ng/mL	0.77 (0.61, 0.96)	0.02	0.119	2827	102	280735.5
Heart failure	Bisphenol F Urine	BPF	URXBPF	Phenols & PCPs (urine)	Urine	ug/L	1.13 (1.01, 1.26)	0.026	0.152	4576	143	392264.0
Heart failure	Urinary Total Hydroxycotinine	U-HydCotinine	URXHCTT	Smoking/Nicotine Biomarkers	Urine	ng/mL	1.04 (1.00, 1.09)	0.039	0.215	5549	160	518545.8
Heart failure	Blood Methylmercury	MeHg	LBXBGM	Heavy Metals - Blood	Blood	ug/L	0.92 (0.85, 1.00)	0.042	0.225	13552	439	1456502.4
Stroke	Blood Cadmium	Blood Cd	LBXBCD	Heavy Metals - Blood	Blood	ug/L	1.16 (1.07, 1.26)	0.000477	0.045	39725	1451	4466429.7
Stroke	Mercury Urine (inorganic)	U-Hg	URXUHG	Urine Metals	Urine	ug/L	0.89 (0.83, 0.95)	0.00087	0.045	14952	495	1495618.6
Stroke	Linear Perfluorooctanoate	n-PFOA	LBXNFOA	PFAS (serum)	Serum	ng/mL	0.71 (0.57, 0.87)	0.001	0.045	2833	117	406877.4
Stroke	Blood Mercury Total	Blood THg	LBXTHG	Heavy Metals - Blood	Blood	ug/L	0.90 (0.84, 0.96)	0.001	0.045	34276	1248	3891886.1
Stroke	Total Urinary Arsenic	U-As(total)	URXUAS	Arsenic Speciated (urine)	Urine	ug/L	0.89 (0.82, 0.96)	0.002	0.054	14040	547	1650806.0
Stroke	1-Hydroxynapthalene (1-Naphthol)	1-OHNap	URXP01	PAH Metabolites (urine)	Urine	ng/L	1.08 (1.03, 1.14)	0.003	0.067	14438	516	1537679.8
Stroke	Thallium Urine	U-Tl	URXUTL	Urine Metals	Urine	ug/L	0.88 (0.80, 0.96)	0.004	0.078	16582	620	1870288.7
Stroke	Blood Nitromethane	Nitromethane	LBXNM	Blood Aldehydes	Blood	pg/mL	1.49 (1.12, 1.98)	0.006	0.095	5968	218	602499.0
Stroke	Dimethylarsonic Acid Urine	DMA	URXUDMA	Arsenic Speciated (urine)	Urine	ug/L	0.84 (0.75, 0.95)	0.006	0.095	14070	552	1672658.1
Stroke	Urinary Nitrate	Nitrate	URXNO3	Perchlorate/Nitrate/Thiocyanate (urine)	Urine	ng/mL	0.90 (0.83, 0.98)	0.017	0.206	18520	689	2139443.2
Stroke	Urinary Iodine	U-I	URXUIO	Iodine (urine)	Urine	ug/L	1.09 (1.01, 1.17)	0.024	0.206	17105	606	1815352.8
Stroke	Barium Urine	U-Ba	URXUBA	Urine Metals	Urine	ug/L	0.93 (0.87, 0.99)	0.025	0.206	16495	615	1860147.5
Stroke	Arsenous Acid (AsIII) Urine	As(III)	URXUAS3	Arsenic Speciated (urine)	Urine	ug/L	0.85 (0.74, 0.98)	0.025	0.206	14070	552	1672658.1
Stroke	1-Aminonaphthalene Urine	1-AN	URX1NP	Aromatic Amines (urine)	Urine	pg/mL	1.22 (1.02, 1.45)	0.026	0.206	2009	60	221148.4
Stroke	o-Anisidine Urine	o-An	URXANS	Aromatic Amines (urine)	Urine	pg/mL	0.73 (0.55, 0.96)	0.026	0.206	1902	56	204830.3
Stroke	Blood Methylmercury	MeHg	LBXBGM	Heavy Metals - Blood	Blood	ug/L	0.91 (0.84, 0.99)	0.027	0.206	13572	553	1748495.7
Stroke	Arsenobetaine Urine	AsB	URXUAB	Arsenic Speciated (urine)	Urine	ug/L	0.94 (0.90, 0.99)	0.028	0.206	14070	552	1672658.1
Stroke	p,p'-DDE Lipid Adjusted	p,p'-DDE	LBXPDELA	POPs - OC Pesticides (serum, lipid-adj)	Serum	ng/g lipid	0.84 (0.72, 0.98)	0.028	0.206	3698	118	364387.6
Stroke	Strontium Urine	U-Sr	URXUSR	Urine Metals	Urine	ug/L	0.89 (0.79, 0.99)	0.029	0.206	6265	236	751711.9
Stroke	3,5,6-Trichloro-2-Pyridinol (TCPy)	TCPy	URXCPM	Specific Pesticide Metabolites (urine)	Urine	ug/L	1.11 (1.01, 1.21)	0.03	0.206	10092	332	1119298.7
Stroke	Branched Isomers of PFOS	Br-PFOS	LBXMFOS	PFAS (serum)	Serum	ng/mL	0.78 (0.62, 0.99)	0.042	0.274	2833	117	406877.4
