# Supplementary material
Source: Research Square preprint supplement (doi:10.21203/rs.3.rs-10209423/v1)
Supplement: Supplementary file 2 [file 485dbb32fedfd772ca875c2a.xlsx]

## Sheet: TableS4
Table S3. Chemical-category enrichment summary across the six cardiovascular outcomes
Outcome	Category	Tested biomarkers	Nominal associations	Nominal hit rate	Nominal enrichment OR	Nominal enrichment P	Nominal enrichment FDR	FDR-supported associations	FDR hit rate	FDR enrichment OR	FDR enrichment P	FDR enrichment FDR
Angina	POPs - PCBs (serum, lipid-adj)	8	6	0.750	22.04	1.44e-04	0.003	2	0.250	19.93	0.017	0.402
Angina	POPs - OC Pesticides (serum, lipid-adj)	4	3	0.750	18.62	0.011	0.134	0	0.000	0.00	1.000	1.000
Angina	Hemoglobin Adducts (blood)	4	2	0.500	5.93	0.110	0.730	1	0.250	13.67	0.112	1.000
Angina	VOC Metabolites - Mercapturic Acids (urine)	14	0	0.000	0.00	0.127	0.730	0	0.000	0.00	1.000	1.000
Angina	Blood Aldehydes	1	1	1.000	Inf	0.152	0.730	0	0.000	0.00	1.000	1.000
Angina	PAH Metabolites (urine)	12	0	0.000	0.00	0.213	0.851	0	0.000	0.00	1.000	1.000
Angina	Specific Pesticide Metabolites (urine)	8	2	0.250	1.94	0.350	1.000	1	0.125	5.89	0.215	1.000
Angina	Smoking/Nicotine Biomarkers	3	1	0.333	2.85	0.393	1.000	0	0.000	0.00	1.000	1.000
Angina	Arsenic Speciated (urine)	4	1	0.250	1.89	0.487	1.000	0	0.000	0.00	1.000	1.000
Angina	Phytoestrogens (urine)	4	1	0.250	1.89	0.487	1.000	0	0.000	0.00	1.000	1.000
Angina	Heavy Metals - Blood	5	1	0.200	1.41	0.568	1.000	0	0.000	0.00	1.000	1.000
Angina	Phenols & PCPs (urine)	7	0	0.000	0.00	0.595	1.000	0	0.000	0.00	1.000	1.000
Angina	Urine Metals	13	1	0.077	0.44	0.691	1.000	0	0.000	0.00	1.000	1.000
Angina	Phthalates (urine)	14	1	0.071	0.40	0.695	1.000	0	0.000	0.00	1.000	1.000
Angina	PFAS (serum)	10	1	0.100	0.60	1.000	1.000	0	0.000	0.00	1.000	1.000
Angina	Aromatic Amines (urine)	5	0	0.000	0.00	1.000	1.000	0	0.000	0.00	1.000	1.000
Angina	Blood VOCs	4	0	0.000	0.00	1.000	1.000	0	0.000	0.00	1.000	1.000
Angina	Heterocyclic Aromatic Amines (urine)	2	0	0.000	0.00	1.000	1.000	0	0.000	0.00	1.000	1.000
Angina	Iodine (urine)	1	0	0.000	0.00	1.000	1.000	0	0.000	0.00	1.000	1.000
Angina	OP Pesticides - DAPs (urine)	4	0	0.000	0.00	1.000	1.000	0	0.000	0.00	1.000	1.000
Angina	Perchlorate/Nitrate/Thiocyanate (urine)	3	0	0.000	0.00	1.000	1.000	0	0.000	0.00	1.000	1.000
Angina	POPs - Dioxins/Furans (serum, lipid-adj)	3	0	0.000	0.00	1.000	1.000	0	0.000	0.00	1.000	1.000
Angina	Trace Elements - Serum	3	0	0.000	0.00	1.000	1.000	0	0.000	0.00	1.000	1.000
Angina	VOC Metabolites - Organic Acids (urine)	2	0	0.000	0.00	1.000	1.000	0	0.000	0.00	1.000	1.000
Coronary heart disease	POPs - OC Pesticides (serum, lipid-adj)	4	3	0.750	15.64	0.017	0.247	0	0.000	0.00	1.000	1.000
Coronary heart disease	VOC Metabolites - Organic Acids (urine)	2	2	1.000	Inf	0.029	0.247	0	0.000	0.00	1.000	1.000
Coronary heart disease	POPs - PCBs (serum, lipid-adj)	8	4	0.500	5.40	0.031	0.247	0	0.000	0.00	1.000	1.000
Coronary heart disease	PAH Metabolites (urine)	12	0	0.000	0.00	0.126	0.558	0	0.000	0.00	1.000	1.000
Coronary heart disease	VOC Metabolites - Mercapturic Acids (urine)	14	0	0.000	0.00	0.129	0.558	0	0.000	0.00	1.000	1.000
Coronary heart disease	Hemoglobin Adducts (blood)	4	2	0.500	5.00	0.140	0.558	0	0.000	0.00	1.000	1.000
Coronary heart disease	Blood Aldehydes	1	1	1.000	Inf	0.174	0.596	0	0.000	0.00	1.000	1.000
Coronary heart disease	Aromatic Amines (urine)	5	2	0.400	3.32	0.208	0.624	0	0.000	0.00	1.000	1.000
Coronary heart disease	Smoking/Nicotine Biomarkers	3	1	0.333	2.41	0.439	1.000	0	0.000	0.00	1.000	1.000
Coronary heart disease	Phthalates (urine)	14	1	0.071	0.34	0.463	1.000	0	0.000	0.00	1.000	1.000
Coronary heart disease	Arsenic Speciated (urine)	4	1	0.250	1.60	0.539	1.000	0	0.000	0.00	1.000	1.000
Coronary heart disease	Phytoestrogens (urine)	4	1	0.250	1.60	0.539	1.000	0	0.000	0.00	1.000	1.000
Coronary heart disease	Heavy Metals - Blood	5	0	0.000	0.00	0.587	1.000	0	0.000	0.00	1.000	1.000
Coronary heart disease	Specific Pesticide Metabolites (urine)	8	2	0.250	1.63	0.628	1.000	0	0.000	0.00	1.000	1.000
Coronary heart disease	Urine Metals	13	2	0.154	0.85	1.000	1.000	0	0.000	0.00	1.000	1.000
Coronary heart disease	Phenols & PCPs (urine)	7	1	0.143	0.78	1.000	1.000	0	0.000	0.00	1.000	1.000
Coronary heart disease	PFAS (serum)	10	1	0.100	0.51	1.000	1.000	0	0.000	0.00	1.000	1.000
Coronary heart disease	Blood VOCs	4	0	0.000	0.00	1.000	1.000	0	0.000	0.00	1.000	1.000
Coronary heart disease	Heterocyclic Aromatic Amines (urine)	2	0	0.000	0.00	1.000	1.000	0	0.000	0.00	1.000	1.000
Coronary heart disease	Iodine (urine)	1	0	0.000	0.00	1.000	1.000	0	0.000	0.00	1.000	1.000
Coronary heart disease	OP Pesticides - DAPs (urine)	4	0	0.000	0.00	1.000	1.000	0	0.000	0.00	1.000	1.000
Coronary heart disease	Perchlorate/Nitrate/Thiocyanate (urine)	3	0	0.000	0.00	1.000	1.000	0	0.000	0.00	1.000	1.000
Coronary heart disease	POPs - Dioxins/Furans (serum, lipid-adj)	3	0	0.000	0.00	1.000	1.000	0	0.000	0.00	1.000	1.000
Coronary heart disease	Trace Elements - Serum	3	0	0.000	0.00	1.000	1.000	0	0.000	0.00	1.000	1.000
Composite cardiovascular disease	POPs - OC Pesticides (serum, lipid-adj)	4	3	0.750	13.38	0.024	0.568	0	0.000	0.00	1.000	1.000
Composite cardiovascular disease	Phthalates (urine)	14	0	0.000	0.00	0.072	0.587	0	0.000	0.00	0.603	1.000
Composite cardiovascular disease	PAH Metabolites (urine)	12	0	0.000	0.00	0.123	0.587	0	0.000	0.00	0.598	1.000
Composite cardiovascular disease	Phenols & PCPs (urine)	7	3	0.429	3.31	0.135	0.587	1	0.143	2.00	0.448	1.000
Composite cardiovascular disease	Arsenic Speciated (urine)	4	2	0.500	4.30	0.172	0.587	0	0.000	0.00	1.000	1.000
Composite cardiovascular disease	Hemoglobin Adducts (blood)	4	2	0.500	4.30	0.172	0.587	1	0.250	4.06	0.285	1.000
Composite cardiovascular disease	Blood Aldehydes	1	1	1.000	Inf	0.196	0.587	1	1.000	Inf	0.080	0.957
Composite cardiovascular disease	Iodine (urine)	1	1	1.000	Inf	0.196	0.587	1	1.000	Inf	0.080	0.957
Composite cardiovascular disease	Heavy Metals - Blood	5	2	0.400	2.85	0.252	0.672	1	0.200	3.04	0.344	1.000
Composite cardiovascular disease	Urine Metals	13	4	0.308	1.96	0.283	0.678	2	0.154	2.32	0.277	1.000
Composite cardiovascular disease	POPs - PCBs (serum, lipid-adj)	8	0	0.000	0.00	0.355	0.710	0	0.000	0.00	1.000	1.000
Composite cardiovascular disease	Specific Pesticide Metabolites (urine)	8	0	0.000	0.00	0.355	0.710	0	0.000	0.00	1.000	1.000
Composite cardiovascular disease	Perchlorate/Nitrate/Thiocyanate (urine)	3	1	0.333	2.08	0.482	0.827	1	0.333	6.09	0.222	1.000
Composite cardiovascular disease	Smoking/Nicotine Biomarkers	3	1	0.333	2.08	0.482	0.827	1	0.333	6.09	0.222	1.000
Composite cardiovascular disease	Blood VOCs	4	1	0.250	1.38	1.000	1.000	0	0.000	0.00	1.000	1.000
Composite cardiovascular disease	Phytoestrogens (urine)	4	1	0.250	1.38	1.000	1.000	0	0.000	0.00	1.000	1.000
Composite cardiovascular disease	Aromatic Amines (urine)	5	1	0.200	1.03	1.000	1.000	0	0.000	0.00	1.000	1.000
Composite cardiovascular disease	PFAS (serum)	10	2	0.200	1.03	1.000	1.000	1	0.100	1.31	0.577	1.000
Composite cardiovascular disease	OP Pesticides - DAPs (urine)	4	0	0.000	0.00	1.000	1.000	0	0.000	0.00	1.000	1.000
Composite cardiovascular disease	POPs - Dioxins/Furans (serum, lipid-adj)	3	0	0.000	0.00	1.000	1.000	0	0.000	0.00	1.000	1.000
Composite cardiovascular disease	Trace Elements - Serum	3	0	0.000	0.00	1.000	1.000	0	0.000	0.00	1.000	1.000
Composite cardiovascular disease	VOC Metabolites - Mercapturic Acids (urine)	14	2	0.143	0.66	1.000	1.000	1	0.071	0.88	1.000	1.000
Composite cardiovascular disease	Heterocyclic Aromatic Amines (urine)	2	0	0.000	0.00	1.000	1.000	0	0.000	0.00	1.000	1.000
Composite cardiovascular disease	VOC Metabolites - Organic Acids (urine)	2	0	0.000	0.00	1.000	1.000	0	0.000	0.00	1.000	1.000
Heart attack	Hemoglobin Adducts (blood)	4	2	0.500	7.19	0.083	0.990	0	0.000	0.00	1.000	1.000
Heart attack	POPs - OC Pesticides (serum, lipid-adj)	4	2	0.500	7.19	0.083	0.990	0	0.000	0.00	1.000	1.000
Heart attack	Blood Aldehydes	1	1	1.000	Inf	0.130	1.000	0	0.000	0.00	1.000	1.000
Heart attack	Phenols & PCPs (urine)	7	2	0.286	2.84	0.227	1.000	0	0.000	0.00	1.000	1.000
Heart attack	VOC Metabolites - Organic Acids (urine)	2	1	0.500	6.83	0.245	1.000	0	0.000	0.00	1.000	1.000
Heart attack	Smoking/Nicotine Biomarkers	3	1	0.333	3.42	0.345	1.000	1	0.333	20.15	0.085	1.000
Heart attack	PAH Metabolites (urine)	12	0	0.000	0.00	0.365	1.000	0	0.000	0.00	1.000	1.000
Heart attack	Aromatic Amines (urine)	5	1	0.200	1.70	0.508	1.000	1	0.200	10.33	0.139	1.000
Heart attack	Heavy Metals - Blood	5	1	0.200	1.70	0.508	1.000	1	0.200	10.33	0.139	1.000
Heart attack	POPs - PCBs (serum, lipid-adj)	8	0	0.000	0.00	0.596	1.000	0	0.000	0.00	1.000	1.000
Heart attack	Specific Pesticide Metabolites (urine)	8	0	0.000	0.00	0.596	1.000	0	0.000	0.00	1.000	1.000
Heart attack	Urine Metals	13	2	0.154	1.24	0.678	1.000	0	0.000	0.00	1.000	1.000
Heart attack	Phthalates (urine)	14	2	0.143	1.12	1.000	1.000	0	0.000	0.00	1.000	1.000
Heart attack	VOC Metabolites - Mercapturic Acids (urine)	14	2	0.143	1.12	1.000	1.000	0	0.000	0.00	1.000	1.000
Heart attack	PFAS (serum)	10	1	0.100	0.73	1.000	1.000	1	0.100	4.54	0.262	1.000
Heart attack	Arsenic Speciated (urine)	4	0	0.000	0.00	1.000	1.000	0	0.000	0.00	1.000	1.000
Heart attack	Blood VOCs	4	0	0.000	0.00	1.000	1.000	0	0.000	0.00	1.000	1.000
Heart attack	Heterocyclic Aromatic Amines (urine)	2	0	0.000	0.00	1.000	1.000	0	0.000	0.00	1.000	1.000
Heart attack	Iodine (urine)	1	0	0.000	0.00	1.000	1.000	0	0.000	0.00	1.000	1.000
Heart attack	OP Pesticides - DAPs (urine)	4	0	0.000	0.00	1.000	1.000	0	0.000	0.00	1.000	1.000
Heart attack	Perchlorate/Nitrate/Thiocyanate (urine)	3	0	0.000	0.00	1.000	1.000	0	0.000	0.00	1.000	1.000
Heart attack	Phytoestrogens (urine)	4	0	0.000	0.00	1.000	1.000	0	0.000	0.00	1.000	1.000
Heart attack	POPs - Dioxins/Furans (serum, lipid-adj)	3	0	0.000	0.00	1.000	1.000	0	0.000	0.00	1.000	1.000
Heart attack	Trace Elements - Serum	3	0	0.000	0.00	1.000	1.000	0	0.000	0.00	1.000	1.000
Heart failure	Urine Metals	13	6	0.462	4.43	0.017	0.413	4	0.308	4.12	0.046	0.942
Heart failure	Heavy Metals - Blood	5	3	0.600	7.02	0.046	0.494	2	0.400	5.55	0.103	0.942
Heart failure	Smoking/Nicotine Biomarkers	3	2	0.667	9.03	0.091	0.494	1	0.333	3.94	0.311	0.942
Heart failure	PFAS (serum)	10	4	0.400	3.18	0.093	0.494	2	0.200	2.02	0.326	0.942
Heart failure	PAH Metabolites (urine)	12	0	0.000	0.00	0.122	0.494	0	0.000	0.00	0.360	0.942
Heart failure	Phenols & PCPs (urine)	7	3	0.429	3.48	0.123	0.494	2	0.286	3.30	0.187	0.942
Heart failure	Iodine (urine)	1	1	1.000	Inf	0.188	0.646	0	0.000	0.00	1.000	1.000
Heart failure	POPs - PCBs (serum, lipid-adj)	8	0	0.000	0.00	0.352	0.913	0	0.000	0.00	0.596	1.000
Heart failure	Specific Pesticide Metabolites (urine)	8	0	0.000	0.00	0.352	0.913	0	0.000	0.00	0.596	1.000
Heart failure	Perchlorate/Nitrate/Thiocyanate (urine)	3	1	0.333	2.18	0.468	0.913	1	0.333	3.94	0.311	0.942
Heart failure	Phthalates (urine)	14	1	0.071	0.31	0.469	0.913	0	0.000	0.00	0.371	0.942
Heart failure	VOC Metabolites - Mercapturic Acids (urine)	14	1	0.071	0.31	0.469	0.913	1	0.071	0.56	1.000	1.000
Heart failure	Arsenic Speciated (urine)	4	1	0.250	1.45	0.571	0.913	1	0.250	2.62	0.393	0.942
Heart failure	Hemoglobin Adducts (blood)	4	1	0.250	1.45	0.571	0.913	1	0.250	2.62	0.393	0.942
Heart failure	POPs - OC Pesticides (serum, lipid-adj)	4	1	0.250	1.45	0.571	0.913	0	0.000	0.00	1.000	1.000
Heart failure	Aromatic Amines (urine)	5	1	0.200	1.08	1.000	1.000	1	0.200	1.95	0.465	1.000
Heart failure	Blood VOCs	4	0	0.000	0.00	1.000	1.000	0	0.000	0.00	1.000	1.000
Heart failure	OP Pesticides - DAPs (urine)	4	0	0.000	0.00	1.000	1.000	0	0.000	0.00	1.000	1.000
Heart failure	Phytoestrogens (urine)	4	0	0.000	0.00	1.000	1.000	0	0.000	0.00	1.000	1.000
Heart failure	Blood Aldehydes	1	0	0.000	0.00	1.000	1.000	0	0.000	0.00	1.000	1.000
Heart failure	Heterocyclic Aromatic Amines (urine)	2	0	0.000	0.00	1.000	1.000	0	0.000	0.00	1.000	1.000
Heart failure	POPs - Dioxins/Furans (serum, lipid-adj)	3	0	0.000	0.00	1.000	1.000	0	0.000	0.00	1.000	1.000
Heart failure	Trace Elements - Serum	3	0	0.000	0.00	1.000	1.000	0	0.000	0.00	1.000	1.000
Heart failure	VOC Metabolites - Organic Acids (urine)	2	0	0.000	0.00	1.000	1.000	0	0.000	0.00	1.000	1.000
Stroke	Arsenic Speciated (urine)	4	4	1.000	Inf	4.14e-04	0.010	0	0.000	0.00	1.000	1.000
Stroke	Heavy Metals - Blood	5	3	0.600	9.32	0.025	0.302	2	0.400	38.62	0.006	0.148
Stroke	Urine Metals	13	4	0.308	2.80	0.113	0.498	1	0.077	3.34	0.330	1.000
Stroke	Phthalates (urine)	14	0	0.000	0.00	0.127	0.498	0	0.000	0.00	1.000	1.000
Stroke	VOC Metabolites - Mercapturic Acids (urine)	14	0	0.000	0.00	0.127	0.498	0	0.000	0.00	1.000	1.000
Stroke	Blood Aldehydes	1	1	1.000	Inf	0.152	0.498	0	0.000	0.00	1.000	1.000
Stroke	Iodine (urine)	1	1	1.000	Inf	0.152	0.498	0	0.000	0.00	1.000	1.000
Stroke	Aromatic Amines (urine)	5	2	0.400	3.94	0.166	0.498	0	0.000	0.00	1.000	1.000
Stroke	Perchlorate/Nitrate/Thiocyanate (urine)	3	1	0.333	2.85	0.393	1.000	0	0.000	0.00	1.000	1.000
Stroke	POPs - OC Pesticides (serum, lipid-adj)	4	1	0.250	1.89	0.487	1.000	0	0.000	0.00	1.000	1.000
Stroke	Phenols & PCPs (urine)	7	0	0.000	0.00	0.595	1.000	0	0.000	0.00	1.000	1.000
Stroke	POPs - PCBs (serum, lipid-adj)	8	0	0.000	0.00	0.607	1.000	0	0.000	0.00	1.000	1.000
Stroke	PFAS (serum)	10	2	0.200	1.43	0.649	1.000	1	0.100	4.54	0.262	1.000
Stroke	PAH Metabolites (urine)	12	1	0.083	0.48	0.692	1.000	0	0.000	0.00	1.000	1.000
Stroke	Specific Pesticide Metabolites (urine)	8	1	0.125	0.79	1.000	1.000	0	0.000	0.00	1.000	1.000
Stroke	Blood VOCs	4	0	0.000	0.00	1.000	1.000	0	0.000	0.00	1.000	1.000
Stroke	Hemoglobin Adducts (blood)	4	0	0.000	0.00	1.000	1.000	0	0.000	0.00	1.000	1.000
Stroke	Heterocyclic Aromatic Amines (urine)	2	0	0.000	0.00	1.000	1.000	0	0.000	0.00	1.000	1.000
Stroke	OP Pesticides - DAPs (urine)	4	0	0.000	0.00	1.000	1.000	0	0.000	0.00	1.000	1.000
Stroke	Phytoestrogens (urine)	4	0	0.000	0.00	1.000	1.000	0	0.000	0.00	1.000	1.000
Stroke	POPs - Dioxins/Furans (serum, lipid-adj)	3	0	0.000	0.00	1.000	1.000	0	0.000	0.00	1.000	1.000
Stroke	Smoking/Nicotine Biomarkers	3	0	0.000	0.00	1.000	1.000	0	0.000	0.00	1.000	1.000
Stroke	Trace Elements - Serum	3	0	0.000	0.00	1.000	1.000	0	0.000	0.00	1.000	1.000
Stroke	VOC Metabolites - Organic Acids (urine)	2	0	0.000	0.00	1.000	1.000	0	0.000	0.00	1.000	1.000
Note: Category-level counts, hit rates, and enrichment statistics for nominal and FDR-supported associations.
