# Supplementary material
Source: Research Square preprint supplement (doi:10.21203/rs.3.rs-10209423/v1)
Supplement: Supplementary file 3 [file cf9fde8b072bec36a9322381.xlsx]

## Sheet: TableS2
Table S2. Robustness summary for nominally significant associations in the principal cardiovascular outcomes
Outcome	Chemical	Category	Biospecimen	Never-smoker OR (95% CI)	Never-smoker P	Smoking interaction P	Sex interaction P	Age interaction P	Nonlinear P	Cycles tested	Cycles same direction	Core model OR	Core model P	Direction pattern	Exploratory flag	Exploratory reason
Composite cardiovascular disease	Blood Cadmium	Heavy Metals - Blood	Blood	0.97 (0.89, 1.07)	0.556	0.000348	0.132	8.26e-05	0.058	10	10	1.18	4.65e-15	Higher only	No
Composite cardiovascular disease	Serum Cotinine	Smoking/Nicotine Biomarkers	Serum	1.04 (1.02, 1.06)	0.000263	0.947	2e-07	0.079	0.252	10	10	1.04	1.83e-18	Higher only	No
Composite cardiovascular disease	Blood Nitromethane	Blood Aldehydes	Blood	1.55 (1.12, 2.14)	0.009	0.734	0.196	0.414	0.67	10	10	1.58	3.67e-07	Higher only	No
Composite cardiovascular disease	Ethylene Oxide Hemoglobin Adduct	Hemoglobin Adducts (blood)	Blood	1.11 (0.82, 1.49)	0.511	0.225	0.081	0.129	0.153	10	10	1.23	2.19e-05	Higher only	No
Composite cardiovascular disease	Triclosan Urine	Phenols & PCPs (urine)	Urine	0.99 (0.95, 1.03)	0.618	0.004	0.094	0.847	0.429	10	10	0.94	3.11e-05	Lower only	No
Composite cardiovascular disease	Linear Perfluorooctanoate	PFAS (serum)	Serum	0.62 (0.50, 0.78)	3.45e-05	0.086	0.025	0.192	0.927	10	10	0.68	2.72e-05	Lower only	No
Composite cardiovascular disease	Barium Urine	Urine Metals	Urine	0.94 (0.87, 1.03)	0.195	0.362	0.135	0.94	0.789	10	10	0.93	0.003	Lower only	No
Composite cardiovascular disease	N-Acetyl-S-(2-Cyanoethyl)-L-Cysteine (CYMA)	VOC Metabolites - Mercapturic Acids (urine)	Urine	1.01 (0.91, 1.13)	0.802	0.121	0.022	0.755	0.923	10	10	1.1	4.88e-09	Higher only	No
Composite cardiovascular disease	Tungsten Urine	Urine Metals	Urine	1.12 (1.02, 1.24)	0.015	0.642	0.334	0.199	0.027	10	10	1.1	0.00041	Higher only	No
Composite cardiovascular disease	Urinary Nitrate	Perchlorate/Nitrate/Thiocyanate (urine)	Urine	0.90 (0.82, 0.98)	0.019	0.202	0.01	0.426	0.777	10	10	0.94	0.025	Lower only	No
Composite cardiovascular disease	Urinary Iodine	Iodine (urine)	Urine	1.09 (0.99, 1.19)	0.072	0.57	0.18	0.379	0.011	10	10	1.1	0.000637	Higher only	No
Composite cardiovascular disease	Lead Urine	Urine Metals	Urine	0.92 (0.83, 1.02)	0.107	0.349	0.062	0.349	0.076	10	10	0.93	0.026	Lower only	No
Composite cardiovascular disease	Arsenous Acid (AsIII) Urine	Arsenic Speciated (urine)	Urine	0.89 (0.77, 1.03)	0.122	0.965	0.013	0.709	0.955	10	10	0.87	0.002	Lower only	No
Composite cardiovascular disease	Mercury Urine (inorganic)	Urine Metals	Urine	0.97 (0.88, 1.06)	0.464	0.105	0.274	0.341	0.5	10	10	0.91	0.001	Lower only	No
Composite cardiovascular disease	Blood Mercury Total	Heavy Metals - Blood	Blood	0.98 (0.92, 1.04)	0.524	0.035	7.9e-07	0.102	0.609	10	10	0.92	0.000143	Lower only	No
Composite cardiovascular disease	2-Aminothiazoline-4-Carboxylic Acid (ATCA)	VOC Metabolites - Mercapturic Acids (urine)	Urine	0.85 (0.74, 0.97)	0.019	0.036	0.897	0.051	0.438	10	10	0.94	0.117	Lower only	No
Composite cardiovascular disease	o-Anisidine Urine	Aromatic Amines (urine)	Urine	0.95 (0.75, 1.21)	0.685	0.102	0.262	0.846		10	9	0.91	0.125	Lower only	Yes	cycle_single_level;direction_not_fully_consistent_across_cycles
Composite cardiovascular disease	Trans-Nonachlor Lipid Adjusted	POPs - OC Pesticides (serum, lipid-adj)	Serum	1.28 (1.03, 1.58)	0.025	0.557	0.801	0.174	0.298	10	10	1.23	0.008	Higher only	No
Composite cardiovascular disease	Oxychlordane Lipid Adjusted	POPs - OC Pesticides (serum, lipid-adj)	Serum	1.36 (1.04, 1.79)	0.023	0.362	0.185	0.358	0.523	10	10	1.26	0.01	Higher only	No
Composite cardiovascular disease	Glycidamide Hemoglobin Adduct	Hemoglobin Adducts (blood)	Blood	0.79 (0.69, 0.90)	0.000283	0.003	0.442	0.621	0.258	10	10	1.03	0.563	Lower only	No
Composite cardiovascular disease	Beta-Hexachlorocyclohexane (beta-HCH) Lipid Adjusted	POPs - OC Pesticides (serum, lipid-adj)	Serum	1.05 (0.87, 1.27)	0.599	0.524	0.925	0.657	0.235	10	10	1.13	0.019	Higher only	No
Composite cardiovascular disease	Dimethylarsonic Acid Urine	Arsenic Speciated (urine)	Urine	0.97 (0.86, 1.10)	0.688	0.199	0.09	0.373	0.603	10	10	0.91	0.039	Lower only	No
Composite cardiovascular disease	Bisphenol A Urine	Phenols & PCPs (urine)	Urine	1.08 (0.98, 1.18)	0.126	0.561	0.317	0.266	0.467	10	10	1.07	0.012	Higher only	No
Composite cardiovascular disease	Branched Isomers of PFOS	PFAS (serum)	Serum	0.68 (0.54, 0.86)	0.001	0.092	0.045	0.099	0.344	10	10	0.77	0.008	Lower only	No
Composite cardiovascular disease	Daidzein Urine	Phytoestrogens (urine)	Urine	1.00 (0.94, 1.06)	0.955	0.071	0.828	0.152	0.02	10	10	0.96	0.043	Lower only	No
Composite cardiovascular disease	Bisphenol F Urine	Phenols & PCPs (urine)	Urine	1.08 (0.96, 1.21)	0.189	0.828	0.755	0.885	0.551	10	10	1.11	0.014	Higher only	No
Composite cardiovascular disease	Blood Toluene	Blood VOCs	Blood	1.01 (0.89, 1.14)	0.937	0.043	0.345	0.402	0.121	10	10	1.14	3.17e-05	Higher only	No
Heart attack	Blood Cadmium	Heavy Metals - Blood	Blood	0.98 (0.82, 1.17)	0.826	0.003	0.024	0.02	0.02	10	10	1.29	1.83e-17	Higher only	No
Heart attack	Serum Cotinine	Smoking/Nicotine Biomarkers	Serum	1.04 (1.01, 1.07)	0.005	0.591	0.000113	0.364	0.017	10	10	1.05	6.2e-19	Higher only	No
Heart attack	o-Toluidine Urine	Aromatic Amines (urine)	Urine			0.82	0.548	0.805		10	9	1.47	0.000213	Higher only	Yes	small_sample_or_low_events;cycle_single_level;direction_not_fully_consistent_across_cycles
Heart attack	Linear Perfluorooctanoate	PFAS (serum)	Serum	0.69 (0.54, 0.89)	0.004	0.787	0.448	0.665	0.113	10	10	0.69	3.86e-05	Lower only	No
Heart attack	Trans-Nonachlor Lipid Adjusted	POPs - OC Pesticides (serum, lipid-adj)	Serum	1.35 (1.00, 1.83)	0.048	0.417	0.914	0.019	0.206	10	10	1.35	0.001	Higher only	No
Heart attack	Ethylene Oxide Hemoglobin Adduct	Hemoglobin Adducts (blood)	Blood	1.04 (0.65, 1.66)	0.873	0.192	0.000381	0.28	0.222	10	10	1.34	1.02e-05	Higher only	No
Heart attack	Triclosan Urine	Phenols & PCPs (urine)	Urine	0.94 (0.88, 1.00)	0.049	0.3	0.00072	0.512	0.43	10	10	0.93	0.003	Lower only	No
Heart attack	Mono-(2-Ethylhexyl) Phthalate	Phthalates (urine)	Urine	1.12 (0.98, 1.28)	0.095	0.719	0.823	0.434	0.869	10	10	1.11	0.013	Higher only	No
Heart attack	Acrylamide Hemoglobin Adduct	Hemoglobin Adducts (blood)	Blood	1.07 (0.76, 1.50)	0.708	0.11	0.036	0.75	0.137	10	10	1.36	2.77e-05	Higher only	No
Heart attack	Blood Nitromethane	Blood Aldehydes	Blood	1.12 (0.57, 2.18)	0.747	0.309	0.413	0.44	0.681	10	10	1.6	0.001	Higher only	No
Heart attack	Cadmium Urine	Urine Metals	Urine	0.91 (0.74, 1.12)	0.389	0.016	0.086	0.316	0.601	10	10	1.22	3.43e-05	Higher only	No
Heart attack	N-Acetyl-S-(2-Cyanoethyl)-L-Cysteine (CYMA)	VOC Metabolites - Mercapturic Acids (urine)	Urine	0.86 (0.66, 1.12)	0.272	0.074	0.172	0.804	0.487	10	10	1.12	3.73e-06	Higher only	No
Heart attack	Bisphenol A Urine	Phenols & PCPs (urine)	Urine	1.06 (0.93, 1.20)	0.415	0.855	0.944	0.28	0.835	10	10	1.1	0.018	Higher only	No
Heart attack	Tungsten Urine	Urine Metals	Urine	1.03 (0.86, 1.24)	0.716	0.506	0.499	0.523	0.31	10	10	1.09	0.018	Higher only	No
Heart attack	2-Methylhippuric Acid	VOC Metabolites - Organic Acids (urine)	Urine	0.72 (0.54, 0.97)	0.028	0.063	0.103	0.437	0.282	10	10	0.98	0.625	Lower only	No
Heart attack	Mono-n-Methyl Phthalate	Phthalates (urine)	Urine	1.14 (1.01, 1.29)	0.04	0.269	0.373	0.822	0.336	10	10	1.09	0.039	Higher only	No
Heart attack	N-Acetyl-S-(2-Hydroxypropyl)-L-Cysteine (2-HPMA)	VOC Metabolites - Mercapturic Acids (urine)	Urine	1.02 (0.86, 1.21)	0.803	0.474	0.843	0.072	0.18	10	10	1.15	0.001	Higher only	No
Heart attack	Beta-Hexachlorocyclohexane (beta-HCH) Lipid Adjusted	POPs - OC Pesticides (serum, lipid-adj)	Serum	1.17 (0.81, 1.68)	0.406	0.623	0.372	0.262	0.143	10	10	1.25	0.008	Higher only	No
Heart failure	Urinary Nitrate	Perchlorate/Nitrate/Thiocyanate (urine)	Urine	0.82 (0.72, 0.93)	0.002	0.677	0.031	0.024	0.811	10	10	0.82	1.26e-05	Lower only	No
Heart failure	Blood Cadmium	Heavy Metals - Blood	Blood	1.09 (0.92, 1.28)	0.319	0.451	0.332	0.045	0.391	10	10	1.18	3.3e-05	Higher only	No
Heart failure	Serum Cotinine	Smoking/Nicotine Biomarkers	Serum	1.03 (1.00, 1.07)	0.043	0.997	0.903	0.277	0.075	10	10	1.03	2.95e-06	Higher only	No
Heart failure	Perfluorohexane Sulfonic Acid	PFAS (serum)	Serum	0.88 (0.76, 1.02)	0.082	0.268	0.429	0.642	0.799	10	10	0.81	1.16e-05	Lower only	No
Heart failure	Glycidamide Hemoglobin Adduct	Hemoglobin Adducts (blood)	Blood	0.70 (0.55, 0.90)	0.005	0.229	0.84	0.236	0.949	10	10	0.84	0.005	Lower only	No
Heart failure	Blood Mercury Total	Heavy Metals - Blood	Blood	0.97 (0.87, 1.08)	0.552	0.038	0.276	0.058	0.354	10	10	0.85	9.38e-06	Lower only	No
Heart failure	1-Aminonaphthalene Urine	Aromatic Amines (urine)	Urine			0.676	0.088	0.831		10	9	0.97	0.719	Mixed	Yes	small_sample_or_low_events;cycle_single_level;direction_not_fully_consistent_across_cycles
Heart failure	N-Acetyl-S-(2-Cyanoethyl)-L-Cysteine (CYMA)	VOC Metabolites - Mercapturic Acids (urine)	Urine	1.11 (0.96, 1.27)	0.149	0.447	0.918	0.193	0.306	10	10	1.08	0.004	Higher only	No
Heart failure	Cobalt Urine	Urine Metals	Urine	1.12 (0.97, 1.30)	0.133	0.813	0.07	0.375	0.062	10	10	1.19	3.43e-05	Higher only	No
Heart failure	Lead Urine	Urine Metals	Urine	0.96 (0.80, 1.15)	0.679	0.052	0.072	0.378	0.406	10	10	0.87	0.003	Lower only	No
Heart failure	Tungsten Urine	Urine Metals	Urine	1.25 (1.10, 1.42)	0.000811	0.096	0.035	0.793	0.81	10	10	1.17	0.000188	Higher only	No
Heart failure	Triclosan Urine	Phenols & PCPs (urine)	Urine	0.99 (0.93, 1.06)	0.749	0.006	0.562	0.925	0.889	10	10	0.9	0.000759	Lower only	No
Heart failure	Benzophenone-3 (Oxybenzone) Urine	Phenols & PCPs (urine)	Urine	0.93 (0.87, 0.99)	0.029	0.987	0.04	0.199	0.265	10	10	0.91	0.000403	Lower only	No
Heart failure	Branched Isomers of PFOS	PFAS (serum)	Serum	0.74 (0.43, 1.27)	0.268	0.837	0.006	0.575	0.534	10	10	0.7	0.000711	Lower only	No
Heart failure	Arsenous Acid (AsIII) Urine	Arsenic Speciated (urine)	Urine	0.91 (0.73, 1.14)	0.42	0.348	0.511	0.235	0.662	10	10	0.77	0.002	Lower only	No
Heart failure	Tin Urine	Urine Metals	Urine	1.26 (1.05, 1.53)	0.015	0.244	0.977	0.87	0.965	10	10	1.22	0.000733	Higher only	No
Heart failure	Linear Perfluorooctane Sulfonate	PFAS (serum)	Serum	0.69 (0.44, 1.08)	0.104	0.751	0.002	0.46	0.877	10	10	0.72	0.00051	Lower only	No
Heart failure	Urinary Iodine	Iodine (urine)	Urine	1.17 (1.03, 1.34)	0.018	0.162	0.858	0.792	0.001	10	10	1.15	0.000984	Higher only	No
Heart failure	Trans-Nonachlor Lipid Adjusted	POPs - OC Pesticides (serum, lipid-adj)	Serum	1.63 (1.15, 2.29)	0.006	0.559	0.732	0.27	0.439	10	10	1.48	0.006	Higher only	No
Heart failure	Mono-2-Hydroxy-Isobutyl Phthalate	Phthalates (urine)	Urine	0.77 (0.61, 0.98)	0.031	0.882	0.238	0.753	0.851	10	10	0.75	0.026	Lower only	No
Heart failure	Barium Urine	Urine Metals	Urine	0.94 (0.82, 1.08)	0.393	0.755	0.000309	0.193	0.733	10	10	0.93	0.038	Lower only	No
Heart failure	Mercury Urine (inorganic)	Urine Metals	Urine	1.03 (0.87, 1.21)	0.756	0.016	0.636	0.601	0.706	10	10	0.86	0.006	Lower only	No
Heart failure	Linear Perfluorooctanoate	PFAS (serum)	Serum	0.72 (0.46, 1.12)	0.147	0.904	0.052	0.805	0.214	10	10	0.72	0.002	Lower only	No
Heart failure	Bisphenol F Urine	Phenols & PCPs (urine)	Urine	0.98 (0.83, 1.17)	0.839	0.036	0.499	0.261	0.678	10	10	1.15	0.006	Higher only	No
Heart failure	Urinary Total Hydroxycotinine	Smoking/Nicotine Biomarkers	Urine	0.98 (0.88, 1.08)	0.642	0.978	0.685	0.882	0.117	10	10	1.03	0.039	Higher only	No
Heart failure	Blood Methylmercury	Heavy Metals - Blood	Blood	1.12 (0.98, 1.27)	0.099	0.000558	0.586	0.359	0.751	10	10	0.9	0.01	Lower only	No
Stroke	Blood Cadmium	Heavy Metals - Blood	Blood	1.06 (0.91, 1.23)	0.46	0.009	0.021	0.009	0.603	10	10	1.25	8.98e-11	Higher only	No
Stroke	Mercury Urine (inorganic)	Urine Metals	Urine	0.90 (0.79, 1.01)	0.079	0.818	0.937	0.368	0.275	10	10	0.88	0.000139	Lower only	No
Stroke	Linear Perfluorooctanoate	PFAS (serum)	Serum	0.50 (0.35, 0.70)	5.55e-05	0.021	0.289	0.344	0.856	10	10	0.68	0.00014	Lower only	No
Stroke	Blood Mercury Total	Heavy Metals - Blood	Blood	0.93 (0.83, 1.03)	0.149	0.304	0.039	0.485	0.26	10	10	0.88	4.19e-05	Lower only	No
Stroke	Total Urinary Arsenic	Arsenic Speciated (urine)	Urine	0.94 (0.84, 1.06)	0.294	0.227	0.031	0.018	0.843	10	10	0.88	0.001	Lower only	No
Stroke	1-Hydroxynapthalene (1-Naphthol)	PAH Metabolites (urine)	Urine	1.08 (0.99, 1.17)	0.072	0.482	0.025	0.004	0.479	10	10	1.13	1.4e-07	Higher only	No
Stroke	Thallium Urine	Urine Metals	Urine	0.87 (0.74, 1.01)	0.067	0.852	0.314	0.032	0.000561	10	10	0.88	0.004	Lower only	No
Stroke	Blood Nitromethane	Blood Aldehydes	Blood	1.60 (1.05, 2.44)	0.03	0.913	0.713	0.577	0.026	10	10	1.58	0.000284	Higher only	No
Stroke	Dimethylarsonic Acid Urine	Arsenic Speciated (urine)	Urine	0.91 (0.74, 1.13)	0.418	0.484	0.002	0.01	0.933	10	10	0.84	0.005	Lower only	No
Stroke	Urinary Nitrate	Perchlorate/Nitrate/Thiocyanate (urine)	Urine	0.85 (0.75, 0.97)	0.017	0.044	0.124	0.171	0.598	10	10	0.92	0.054	Lower only	No
Stroke	Urinary Iodine	Iodine (urine)	Urine	1.16 (1.03, 1.31)	0.011	0.083	0.81	0.269	0.917	10	10	1.1	0.013	Higher only	No
Stroke	Barium Urine	Urine Metals	Urine	0.99 (0.88, 1.10)	0.831	0.119	0.273	0.237	0.699	10	10	0.93	0.029	Lower only	No
Stroke	Arsenous Acid (AsIII) Urine	Arsenic Speciated (urine)	Urine	0.93 (0.75, 1.15)	0.478	0.384	0.017	0.189	0.391	10	10	0.84	0.012	Lower only	No
Stroke	1-Aminonaphthalene Urine	Aromatic Amines (urine)	Urine			0.753	0.95	0.004		10	9	1.18	0.002	Mixed	Yes	small_sample_or_low_events;cycle_single_level;direction_not_fully_consistent_across_cycles
Stroke	o-Anisidine Urine	Aromatic Amines (urine)	Urine			0.671	0.261	0.075		10	9	0.77	0.046	Lower only	Yes	small_sample_or_low_events;cycle_single_level;direction_not_fully_consistent_across_cycles
Stroke	Blood Methylmercury	Heavy Metals - Blood	Blood	0.96 (0.86, 1.06)	0.413	0.467	0.259	0.383	0.576	10	10	0.9	0.008	Lower only	No
Stroke	Arsenobetaine Urine	Arsenic Speciated (urine)	Urine	0.96 (0.89, 1.04)	0.332	0.598	0.646	0.7	0.173	10	10	0.94	0.015	Lower only	No
Stroke	p,p'-DDE Lipid Adjusted	POPs - OC Pesticides (serum, lipid-adj)	Serum	1.03 (0.69, 1.52)	0.893	0.22	0.567	0.738	0.291	10	10	0.85	0.061	Lower only	No
Stroke	Strontium Urine	Urine Metals	Urine	0.94 (0.73, 1.22)	0.645	0.645	0.331	0.097	0.739	10	10	0.89	0.035	Lower only	No
Stroke	3,5,6-Trichloro-2-Pyridinol (TCPy)	Specific Pesticide Metabolites (urine)	Urine	1.12 (0.97, 1.29)	0.137	0.805	0.255	0.981	0.885	10	10	1.1	0.047	Higher only	No
Stroke	Branched Isomers of PFOS	PFAS (serum)	Serum	0.53 (0.32, 0.88)	0.014	0.116	0.091	0.399	0.527	10	10	0.76	0.013	Lower only	No
Note: The core model is models that only adjusted for core covariates, inlcuding age, sex, race or ethnicity, educational attainment, family income-to-poverty ratio (PIR) and NHANES cycle.
