# Supplementary material
Source: Research Square preprint supplement (doi:10.21203/rs.3.rs-10209423/v1)

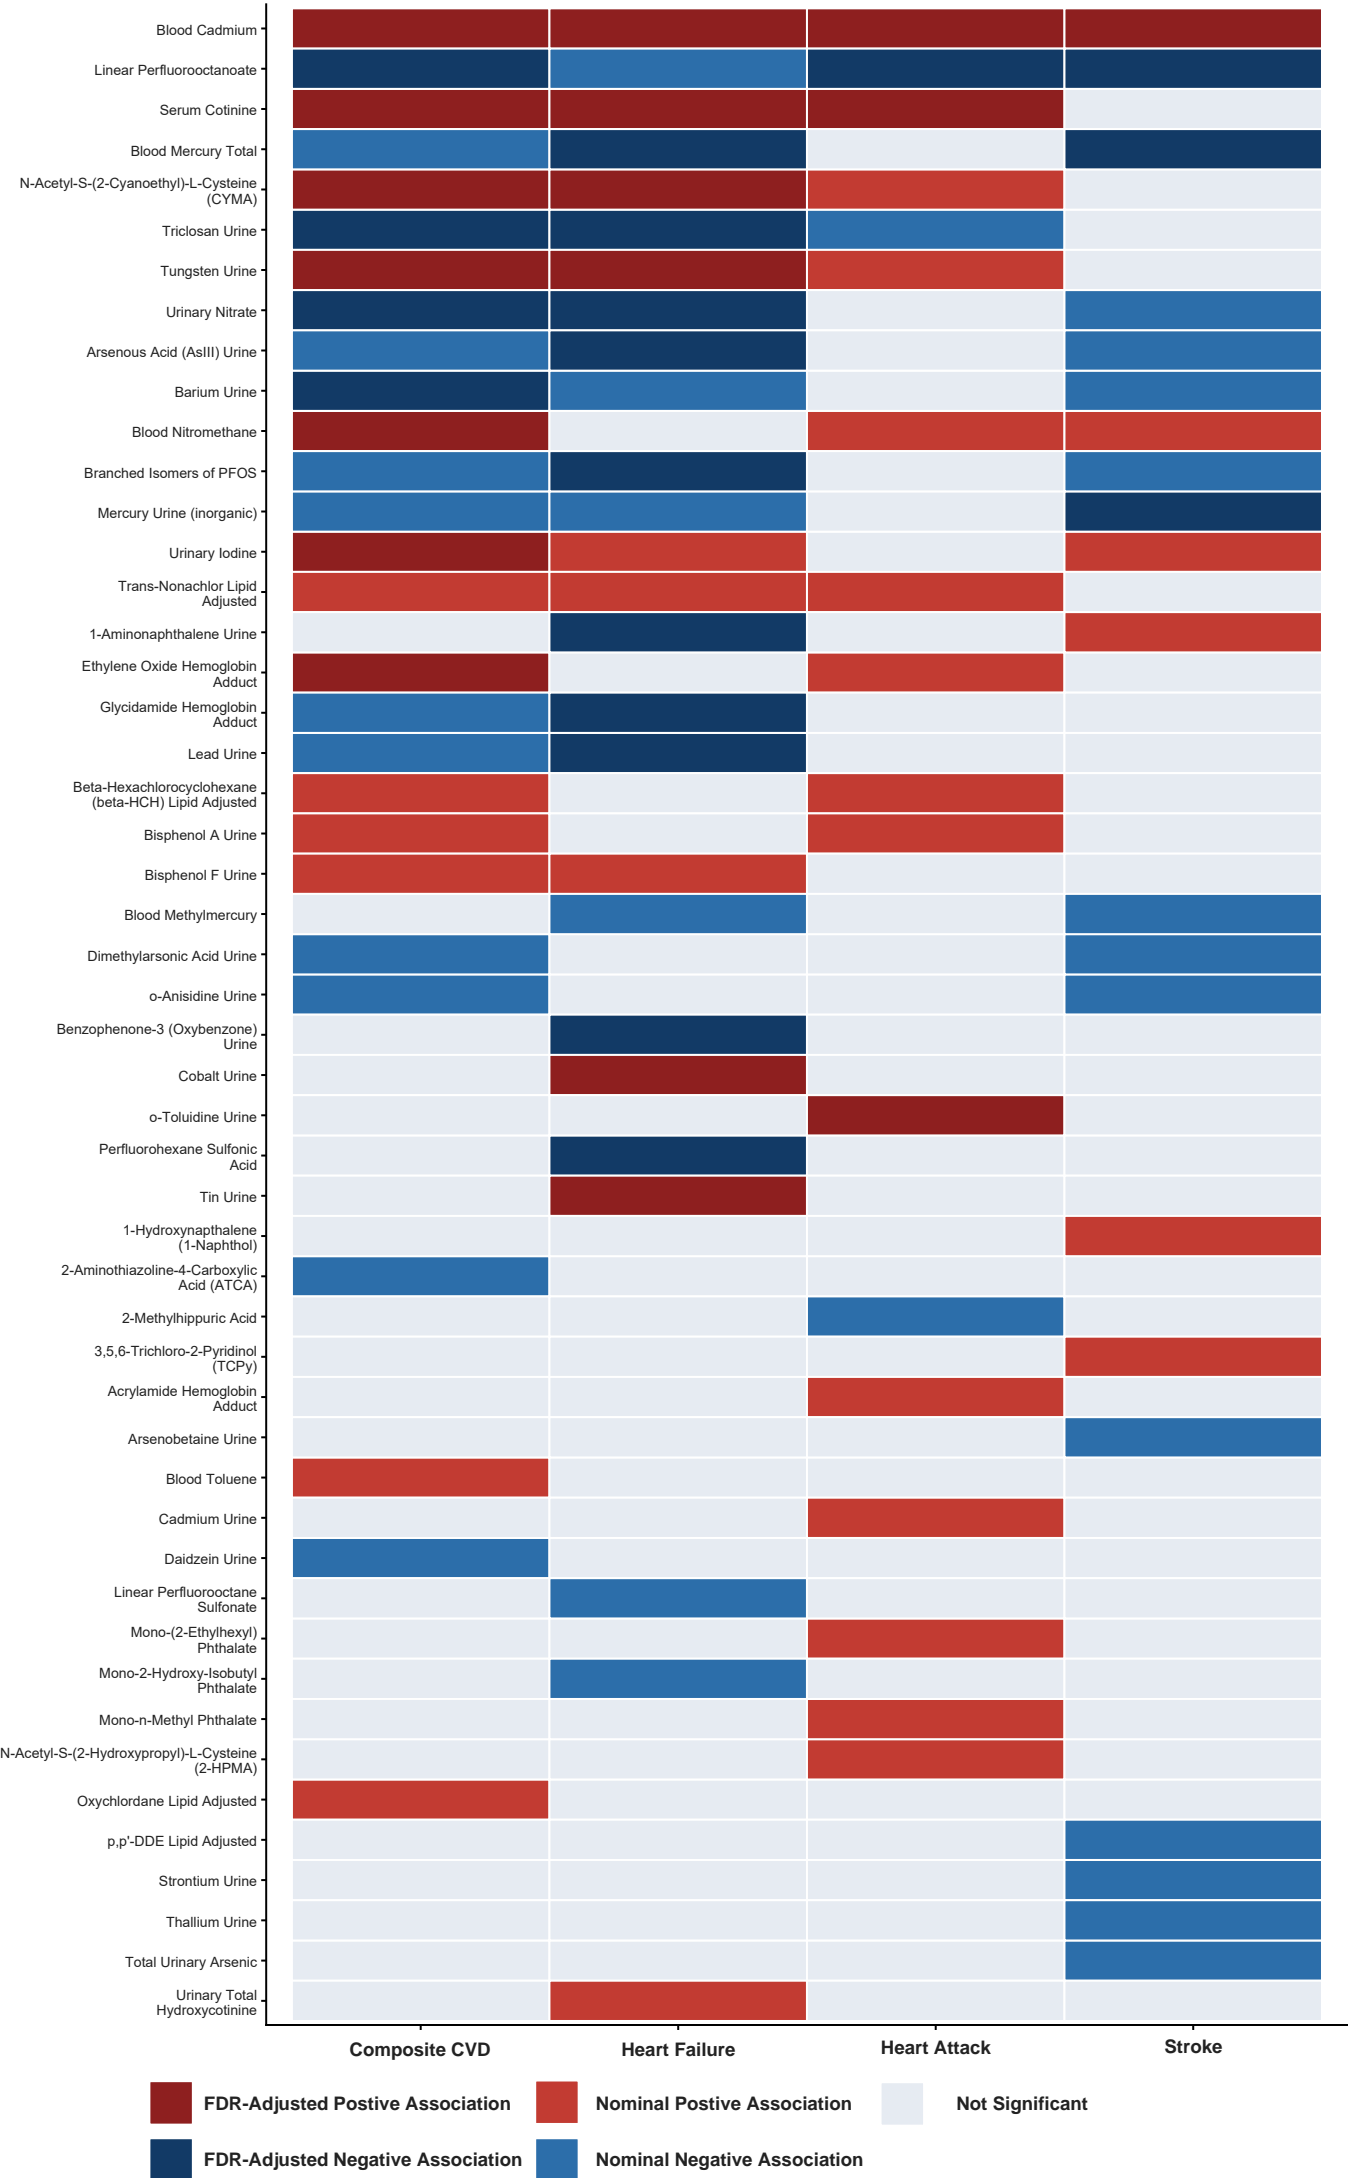

Figure S1. Consistency of exposure associations across primary CVD outcomes

Supplement: Supplementary file 5 [file dcc9d70484e728d41d2e16aa.pdf]
